# Supplementary material for: Negligible isotopic fractionation of nitrogen within temperate Zostera spp. meadows
Source: Copernicus journal article supplement (doi:10.5194/bg-2018-154), 2018-04-09
Supplement: Supplementary file 1 [file bg-2018-154-supplement.pdf]

## Supplementary material

5 **Table A1:** Summary of porewater filterable reactive phosphorous (FRP) and NO<sub>x</sub> concentrations for Western Port field sites over the period February – November 2016.

| Field Site  | February 2016 |                          | March 2016  |                          | May 2016    |                          | July 2016   |                          | November 2016 |                          |
|-------------|---------------|--------------------------|-------------|--------------------------|-------------|--------------------------|-------------|--------------------------|---------------|--------------------------|
|             | [FRP]<br>μM   | [NO <sub>x</sub> ]<br>μM | [FRP]<br>μM | [NO <sub>x</sub> ]<br>μM | [FRP]<br>μM | [NO <sub>x</sub> ]<br>μM | [FRP]<br>μM | [NO <sub>x</sub> ]<br>μM | [FRP]<br>μM   | [NO <sub>x</sub> ]<br>μM |
|             | Mean ± SD     |                          |             |                          |             |                          |             |                          |               |                          |
| Corinella   | 0.6 ± 0.0     | 0.2 ± 0.4                | 0.4 ± 1.2   | 0.3 ± 0.2                | 0.3 ± 0.3   | 0.7 ± 0.8                | 0.8 ± 2.0   | 2.0 ± 2.0                |               |                          |
|             |               | 0.4                      | 0.2         | 1.5                      | 0.0         | 0.4                      | 0.0         | 0.7                      | 0.2           |                          |
| Coronet Bay | 0.6 ± 0.0     | 1.8 ± 0.6                | 1.8 ± 0.6   | 0.4 ± 0.4                | 0.7 ± 0.3   | 0.2 ± 0.3                | 0.7 ± 0.3   | 0.0 ± 0.3                | 0.4 ± 2.4     | 1.1 ± 2.4                |
|             |               | 0.5                      | 0.0         | 0.5                      | 0.2         | 0.7                      | 0.0         | 0.4                      | 0.0           | 1.1                      |
| Rhyll       | 0.3 ± 0.0     | 0.7 ± 1.2                | 1.2 ± 1.2   | 1.1 ± 0.2                | 0.2 ± 0.6   | 0.7 ± 0.7                | 0.4 ± 1.0   | 0.3 ± 20.0               |               |                          |
|             |               | 0.5                      | 0.7         | 1.1                      | 0.7         | 0.4                      | 0.3         | 1.2                      | 0.3           |                          |

10

**Table A2:** Output of two-way ANOVA for porewater NH<sub>4</sub><sup>+</sup> concentrations in Western Port.

| Source        | dF | F      | P       |
|---------------|----|--------|---------|
| Site          | 2  | 11.603 | <0.001* |
| Season        | 4  | 4.425  | <0.01*  |
| Site × Season | 8  | 3.618  | <0.01*  |

15

20

- 5 **Table A3:** Summary of porewater filterable reactive phosphorous (FRP) and NO<sub>x</sub> concentrations for the Port Phillip Bay field sites over the period August – December 2016.

| Field Site                      | August 2016         |                                  | December 2016       |                                  |
|---------------------------------|---------------------|----------------------------------|---------------------|----------------------------------|
|                                 | [FRP] $\mu\text{M}$ | [NO <sub>x</sub> ] $\mu\text{M}$ | [FRP] $\mu\text{M}$ | [NO <sub>x</sub> ] $\mu\text{M}$ |
| <b>Mean <math>\pm</math> SD</b> |                     |                                  |                     |                                  |
| Altona                          | 5 $\pm$ 4           | 1.2 $\pm$ 0.8                    | 10 $\pm$ 6          | 7 $\pm$ 6                        |
| Blairgowrie                     | 2.8 $\pm$ 0.7       | 1.2 $\pm$ 0.4                    | 2.4 $\pm$ 0.5       | 2.6 $\pm$ 1.1                    |
| Kirk Point                      | 44 $\pm$ 18         | 1.2 $\pm$ 0.4                    | 30 $\pm$ 20         | 0.2 $\pm$ 0.4                    |
| North Corio                     | 16 $\pm$ 3          | 2.1 $\pm$ 0.7                    | 7.4 $\pm$ 1.1       | 0.2 $\pm$ 0.4                    |
| Portarlington                   | 5.0 $\pm$ 0.2       | 1.7 $\pm$ 0.4                    | 19 $\pm$ 13         | 0.7 $\pm$ 1.2                    |
| Rosebud                         | 3.4 $\pm$ 1.0       | 1.2 $\pm$ 0.8                    | 6 $\pm$ 2           | 30 $\pm$ 40                      |
| St Kilda                        | 8.4 $\pm$ 0.9       | 5 $\pm$ 2                        | 30 $\pm$ 30         | 1 $\pm$ 1                        |
| St Leonards                     | 8 $\pm$ 4           | 2 $\pm$ 2                        | 4 $\pm$ 1           | 3 $\pm$ 1                        |
| South Corio                     | 5.9 $\pm$ 1.2       | 1.4 $\pm$ 0.7                    | 6.4 $\pm$ 1.1       | 0.7 $\pm$ 0.7                    |
| Swan Bay                        | 4 $\pm$ 3           | 1.0 $\pm$ 0.8                    | 6 $\pm$ 2           | 0.0 $\pm$ 0.0                    |

10

**Table A4:** Output of two-way ANOVA for porewater NH<sub>4</sub><sup>+</sup> concentrations in Port Phillip Bay.

| Source               | dF | F     | P       |
|----------------------|----|-------|---------|
| Site                 | 9  | 8.047 | <0.001* |
| Season               | 1  | 4.664 | 0.037*  |
| Site $\times$ Season | 9  | 2.051 | 0.058   |

15

5

**Table A5:** Output of two-way ANOVA for  $\delta^{15}\text{N}$  seagrass in Western Port.

| <b>Source</b>        | <b>dF</b> | <b>F</b> | <b>P</b> |
|----------------------|-----------|----------|----------|
| Site                 | 2         | 191.55   | <0.001*  |
| Season               | 4         | 30.57    | <0.001*  |
| Site $\times$ Season | 8         | 10.52    | <0.001*  |

10

**Table A6:** Output of two-way ANOVA for  $\delta^{15}\text{N}$  seagrass in Port Phillip Bay.

| <b>Source</b>        | <b>dF</b> | <b>F</b> | <b>P</b> |
|----------------------|-----------|----------|----------|
| Site                 | 9         | 399.804  | <0.001*  |
| Season               | 1         | 0.894    | 0.350    |
| Site $\times$ Season | 9         | 47.499   | <0.001*  |

15

20

25

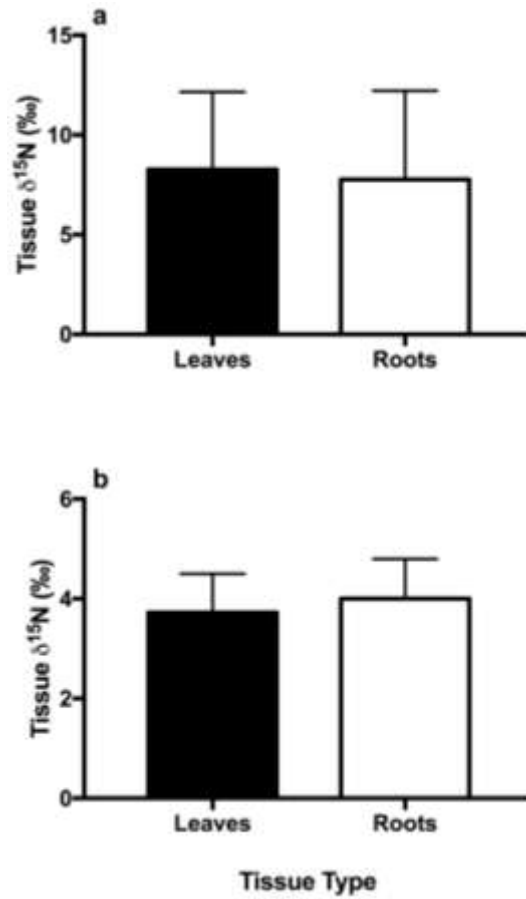

5

Figure A1: Comparisons between the  $\delta^{15}\text{N}$  of the seagrass roots and the  $\delta^{15}\text{N}$  of the seagrass leaves for (a) Port Phillip Bay and (b) Western Port. All values are mean  $\pm$  S.D.
